# Supplementary material
Source: PubMed Central journal article supplement (PMC4224157)
Supplement: 6c57588d3b7797cbcbe483ecdd23e2e7_genetics.114.168815-6.pdf [file 6c57588d3b7797cbcbe483ecdd23e2e7_genetics.114.168815-6.pdf]

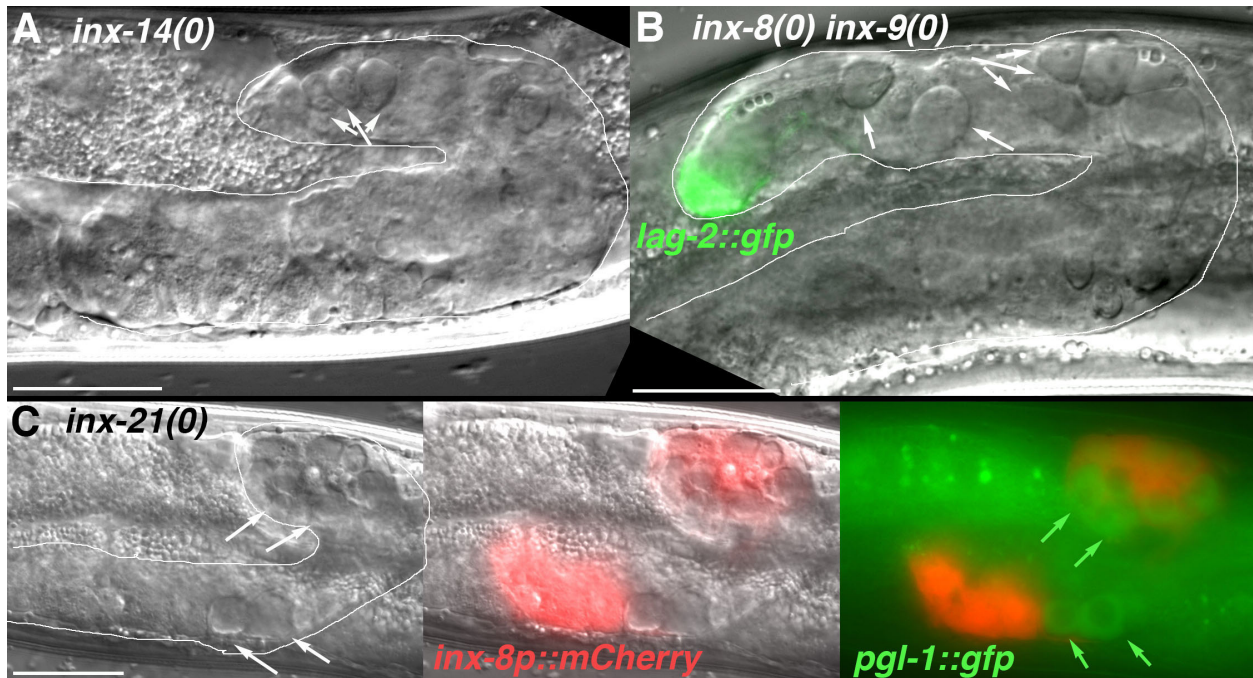

**Figure S6** Germ cells in gonad innexin mutants become necrotic in adults. (A) *inx-14(tm2864)* gonad arm outlined, arrows point to a few of the necrotic foci. (B) *inx-8(tn1474) inx-9(ok1502)* with *lag-2::gfp* reporter marking the DTC and showing that germ cells, (arrows) but not the DTC, appear to undergo necrosis. (C) *inx-21(tn1540)* gonad arm expressing *inx-8p::mCherry* to visualize the DTC and sheath, and *pgl-1::gfp* to indicate germ cells. The distribution pattern of PGL-1::GFP is not particulate as in the wild type (see Figure 9C in the main text). Scale bars, 20 μm.
